# Supplementary material for: Myeloid FSH-FSHR signaling drives menopause-associated cognitive decline via a mitochondrial RNA-dependent neuroinflammation axis
Source: Research Square preprint supplement (doi:10.21203/rs.3.rs-8773348/v1), 2026-02-09
Supplement: Supplementary file 1 [file 78c9a6b366e766d95fd74058.docx]

**Material and methods**

***Fshr* knockout mice and myeloid conditional *Fshr* knockout mice**

*Fshr*-/- mice were referred before1. Briefly, exon 1 of the *Fshr* gene was deleted in C57BL/6 mice using CRISPR-Cas9. To generate myeloid cell-specific *Fshr* knockout mice, F0 generation of *Fshr*fl/fl mice were produced by CRISPR-Cas9, introducing loxP sites on both sides of exon 1 of the *Fshr* gene under C57BL/6 background (Kangweisda GeneTechnology, Wuhan, China). *Fshr*fl/fl mice were crossed with Lyz2-Cre transgenic mice, obtained from GemPharmatech (Nanjing, China). The resulting offspring with the genotype *Fshr*fl/fl×Lyz2-Cre were used as the experimental group, with their *Fshr*fl/fl littermates serving as controls. All C57BL/6 wild type mice were purchased from Charles River Laboratory (Beijing, China). All animal experiments were approved by the Animal Care Committee of Shandong First Medical University and conducted in accordance with the institutional guidelines for the care and use of laboratory animals (No. NSFC 2025-157).

**Fshβ KI transgenic mice**

Fshβ KI mice model was generated using CRISPR/Cas9-mediated genome editing via homology-directed repair. Specifically, a sgRNA (5’-CTGAGCCAACAGTGGTAGTA-3’) targeting the H11 locus was designed. A donor vector (pTRE-Cga-Fshb-CAG-rtTA) containing homology arms was constructed by NBRI (Nanjing, China). A mixture of Cas9, the sgRNA, and the donor vector was microinjected into the pronuclei of fertilized eggs of C57BL/6 mouse. The injected zygotes were then transplanted into pseudopregnant female mice to obtain F0 offspring. The successful integration of the transgene at the H11 locus was confirmed in the F0 generation by PCR genotyping and DNA sequencing. Transgenic founder mice were crossed with wild-type C57BL/6 mice to establish a stably inherited line. For inducing FSH overexpression, 9 months-old female transgenic mice underwent ovariectomy. After that, the mice were fed an estradiol valerate-supplemented diet (2.6 mg/kg, Bayer), and then AAV9 were delivered via intra-bone marrow injection. Following viral infection, mice were randomized to receive either doxycycline-supplemented (200 μg/ml, Sigma-Aldrich, #D3447) or regular drinking water. All animal experiments were approved by the Animal Care Committee of Shandong First Medical University and conducted in accordance with the institutional guidelines for the care and use of laboratory animals.

**Ovariectomized mice**

To establish a model of surgical menopause, we performed bilateral ovariectomy on 9-month-old female mice under anesthesia, with sham-operated mice as controls. We performed ovariectomy under aseptic conditions. After shaving and disinfecting the dorsal skin with 70% ethanol, a ~0.5 cm incision was made through the skin and muscle wall. The ovaries were exteriorized, ligated, and removed. The muscle and skin were then sutured and closed with wound clips, respectively. Post-operatively, each mouse recovered in a clean cage until resuming normal behavior before being returned to its home cage. Hormonal measurements confirmed the expected decline in serum estrogen and rise in FSH in OVX mice. All animals were maintained at 20°C on a 12 h light/dark cycle.

**Drug administration**

Sham or OVX-operated mice were administrated of Clodronate liposomes or Control liposome (400 μl/kg/week, Yeasen Biotechnology, #40337ES08, #40338ES08) by intraosseous infusion for 4 weeks. OVX mice were assigned to receive 8-Azanebularine (2 mg/kg/day, i.p., MCE, HY-145442). 8 weeks after the ovariectomy, mice received daily intraperitoneal injections of either 8-Azanebularine or an equivalent volume of saline for 4 weeks.

GnRHa treatment(1) Sham: sham-operated mice were injected with saline per day; (2) OVX: OVX-operated mice were injected with saline per day; (3) OVX mice were initially injected with GnRHa (0.25 μg/day, i.p., Ferring) for 4 weeks; (4) A two-day treatment cycle was administered to OVX mice for 4 weeks. Each cycle comprised an injection of GnRHa on day 1, followed by an injection of human recombinant FSH (15 IU/kg, i.p., Gonal-F, Merck) on day 2.

**BMMs transplantation**

BMDMs were isolated from donor mice. Briefly, femurs and tibias were harvested following euthanasia, and the bone marrow was flushed with DMEM essential medium. Cells were cultured in the presence of 10 ng/ml M-CSF. After 5 d of culture, pLent-U6-sh*Adarb2*-CMV-RFP-P2A-Puro (4×108 TU/ml) or Scramble (6×108 TU/ml) (Vigenebio, Shandong, China) infected at MOI=100 for 48h. Selection of stably transduced cells was performed by replacing with complete medium supplemented with 100 μg/ml puromycin (Sigma-Aldrich, #P9620) for 3 d. Macrophages were harvested and subsequently transplanted into recipient mice via intraosseous infusion (1×106 per mouse).

**Viral packaging and infection**

The mouse sh*Fshr* sequence: 5’-CCTACCCAACTTGCATGAAATCTCGAGATTTCATGCAAGTTGGGTAGG-3’ or scramble control was cloned into AAV9 backbone. AAV9: F4/80-GFP-miR30-sh*Fshr* or AAV9: F4/80-GFP-miR30-sh*NC* was constructed by Vigene bioscience (Shandong, China) and injected into marrow cavity of the femur‌ at 6×1010 vg per mouse. After recovery of the animal was fed as usual for 8 weeks. The expression of shRNA was measured based on the GFP level by FACS.

**Surgery and microinjection**

Mice were anesthetized with 5 % chloral hydrate and fixed in a stereotaxic apparatus. Bilateral guide cannulas were implanted targeting the anterior cingulate cortex using the following coordinates relative to bregma: AP, +0.98 mm; ML, ±0.4 mm; DV, −1.55 mm. Stylets were inserted into the guide cannulas to prevent occlusion. 1 week after surgery, a microinjection pump (KDS 200, KD Scientific) connected to a 10 μL Hamilton syringe via PE20 tubing was used for drug delivery. 0.5 μl/lateral NAD’-mtRNA was infused into the ACC, and a volume of 0.1 μL was infused over 2 min per side, and the cannulas were left in place for an additional 2 min to ensure diffusion before removal.

**Open field test**

Mice were acclimatized to the testing room for 1 h before the experiment. The test was performed in a sound-attenuated, dark room using a white plastic arena (50 × 50 × 50 cm). Each mouse was gently placed in the center of the arena and allowed to explore freely for 10 min. Its movement was recorded by an overhead camera and analyzed using SMART tracking system (Panlab, DC, USA). The total distance traveled and the time spent in the central zone were quantified. The arena was thoroughly cleaned with 70% ethanol between trials to eliminate olfactory cues.

**Novel object recognition**

The novel object recognition task was performed in a gray PVC open-field arena (50 × 50 × 50 cm). The testing environment was illuminated by dim, diffused lighting to minimize shadows. Behavior was recorded by video camera and scored by SMART tracking system (Panlab, DC, USA). The novel object recognition test was conducted over three consecutive days. On day 1 (habituation), each mouse was placed in the center of the empty arena and allowed to explore for 10 min. On day 2 (training), two identical objects were placed in the arena; the mouse was introduced facing the center of the opposite wall and given 10 min to explore both objects. After a 24 h interval, one of the familiar objects was replaced with a novel object for the 5 min testing session on day 3.

**Cued fear conditioning**

Fear conditioning was performed using a standard fear conditioning chamber (Panlab, Barcelona, Spain). On the conditioning day, mice were first allowed a 10 min habituation period in the chamber without stimulation. This was followed by three conditioning trials, each consisting of a 20 s auditory conditioned stimulus (CS: 5 kHz, 80 dB tone) that co-terminated with unconditioned stimulus (US: 1 s, 0.75 mA foot shock). The inter-trial interval was 180 s. Mice remained in the chamber for 60 s after the final shock before being returned to their home cages. 24h later, mice underwent a training session consisting of 3 presentations of the CS alone (no US), each separated by a 180 s interval. The chamber was cleaned with 70% ethanol after each session to remove olfactory cues.

**Morris water maze**

The maze consisted of a circular pool filled with water maintained at 22 ± 1 °C, which was divided into four imaginary quadrants. A hidden escape platform was positioned in the center of one fixed quadrant, submerged approximately 1–2 cm below the water surface. During the 5 days acquisition phase, each mouse underwent four training trials per day with an inter-trial interval of at least 20 min. In each trial, the mouse was released from different starting points and allowed 60 s to locate the hidden platform. If the mouse failed to find the platform within the allotted time, it was gently guided onto the platform by the experimenter and remained there for 30 s. On the sixth day, a probe trial was conducted in which the platform was removed, and each mouse was allowed to swim freely for 60 s to assess spatial memory retention. All sessions were recorded and analyzed using a video tracking system (Tracking Master V3.0, VanBi) to quantify parameters such as escape latency, path efficiency, and time spent in the target quadrant.

**In vivo two-photon microscopy**

To label blood vessels, mice were injected with rhodamine dextran (dissolved in saline at a concentration of 20 mg/ml and administered at a dose of 5 ml/kg) via the tail vein. A two-photon microscopy (Nikon, A1R MP) was used to capture images of immune cells and blood vessels within the skull in vivo. Prior to imaging, the skull bilaterally adjacent to the midline of the brain was thinned using a cranial drill. Two-photon imaging was then performed using a water immersion objective (25×, NA 1.1, WD 2 mm). The excitation wavelength was set to 920 nm, and the fluorescence signals from immune cells and blood vessels were acquired through two channels: 495–540 nm and 575–630 nm, respectively. Regions of interest were selected bilaterally along the midline for 1 h imaging, and the migration of immune cells was subsequently analyzed using Imaris 10.2 (Oxford, UK).

**Magnetic Resonance Imaging**

MRI was performed on mice using a 9.4 T Bruker BioSpec 94/20 USR system equipped with a 440 mT/m gradient set and a single-channel surface head coil. Mice were anesthetized via inhalation of 2.5–3% isoflurane and securely positioned in a stereotaxic mouse holder with tooth and ear bars for data acquisition. Physiological parameters were monitored throughout the scanning session. Diffusion tensor imaging (DTI) were acquired using a SE-EPI sequence with the following parameters: TR = 1500 ms, TE = 23.27 ms; field of view = 20 × 20 mm²; matrix size = 128 × 128; 22 contiguous slices with 0.7 mm thickness; two b-values (0 and 1000 s/mm²) applied along 30 non-collinear diffusion directions; diffusion time Δ = 10.3 ms, gradient duration δ = 4.1 ms. DICOM images were converted to NIFTI format using MRIcron. Diffusion data were processed using the Slicer v5.8.0, which included eddy current and motion correction (eddy_correct), rotation of b-vectors (fdt_rotate_bvecs), brain extraction based on b0 images (bet), and voxel-wise diffusion tensor modeling to generate fractional anisotropy (FA) maps (dti_fit). Regions of interest in the ACC were manually delineated using ITK-SNAP, and corresponding FA values were extracted for analysis.

**Singal cell RNA sequencing**

Bone marrow cells were isolated from mouse femurs and tibias. The cell suspension was filtered through a 100 μm cell strainer (BD Falcon), washed several times with D-PBS, and mononuclear cells were subsequently enriched by density gradient centrifugation using a murine lymphocyte separation medium. The collected cells were immunostained with anti-CD11b microbeads (STEMCELL Technologies, #18970), and CD11b+ cells were isolated by passing the microbead-conjugated cells through MACS separation columns in a magnetic field. Single-cell suspensions of freshly isolated CD11b+ cells from *Fshr*fl/fl×*Lyz2*-Cre and *Fshr*fl/fl littermate controls were resuspended in PBS containing 0.04% ultrapure BSA. Single-cell transcriptomic library construction and amplification were performed by BGI-Qingdao using the Single Cell reagent (BD Rhapsody) in strict accordance with the manufacturer's protocol. Raw sequencing data were processed through bioinformatic methods including demultiplexing, sequence alignment, and functional analysis.

**Preparation of 5′ppp–mtRNA and 5′NAD–mtRNA by in vitro transcription**

DNA templates for mouse and human were amplified by PCR using the following primers: Human Mt-CO1 T7：5’-TAATACGACTCACTATAGGGACGTTGTAGCCCACTTCCAC-3’, Human Mt-CO1 R：5’-TGGCGTAGGTTTGGTCTAGG-3’; Mouse Mt-Nd1 T7: 5’-TAATACGACTCACTATCTAGCAGAAACAAACCGGGC-3’, Mouse Mt-Nd1 R: 5’-CCGGCTGCGTATTCTACGTT-3’, and PCR products were analyzed by 2% agarose gel electrophoresis and purified using the PCR purification kit (TIANGEN, #DP209). 5′-Triphosphate human mtRNA and mouse mtRNA were synthesized by in vitro transcription following the instruction of T7 High Yield RNA Synthesis Kit (YEASEN, #10623ES50). 5′NAD human mtRNA and mouse mtRNA were made under similar conditions using 2 mM ATP and 4 mM NAD (Sigma-Aldrich, #N0632). The in vitro transcription reactions were incubated at 37 °C for 4 h and digested with DNase I (SparkJade, #AC1711), RNA was purified by Phenol/chloroform-precipitated and resuspended in DEPC2.

**NAD-capQ**

To avoid free NAD contamination in the NAD-capQ assay, purified tissue or cells RNA was washed by dissolution in 2 M urea/10 mM Tris-HCl (pH 7.5), brief heating at 65°C for 2 min, and precipitation with isopropanol/2 M ammonium acetate3. For NAD/NADH quantification, 50 μg of RNA was digested with 1 U of Nuclease P1 (NEB, #M0660S) in 20 μL of Zn²⁺-containing buffer at 37°C for 20 min to release NAD/NADH. Glycerol-supplemented controls were run in parallel to correct for background absorbance. After adding NAD/NADH Extraction Buffer and incubating for 2 h at room temperature, 50 μL samples were analyzed calorimetrically at 450 nm per the manufacturer's protocol (Promega, #G9071). Following background subtraction using the control readings, the resulting signal was proportional to the NAD/NADH concentration.

**Golgi staining**

Mice were anesthetized by intraperitoneal injection of 5% chloral hydrate (7.5 ml/kg). The brains were then rapidly dissected and processed according to the manufacturer's protocol for the FD Rapid GolgiStain™ Kit (FD NeuroTechnologies, #PK401). Using a vibratome (VT1200S, Leica, Germany), 150 μm thick coronal sections were prepared at room temperature. The sections were air-dried for 48 h, followed by three 5 min rinses in DDW. Subsequently, they were immersed in a mixture of Solutions D and E for 5-10 min at 4°C and then rinsed again three times in DDW. The sections were dehydrated through a graded ethanol series, cleared in Histoclear, and finally cover-slipped using DPX mounting medium. Z-stack images were acquired at 20× magnification using VS200 (Olympus, TOKOYO).

**Immunofluorescence and immunocytochemistry staining**

Mice were anesthetized with an intraperitoneal injection of 5% chloral hydrate (7.5 ml/kg), followed by transcardial perfusion with saline and 4% paraformaldehyde. The brains were then harvested, embedded in OCT compound, and sectioned into 40 μm thick slices. The sections were washed twice with PBS to remove the OCT medium. For immunofluorescence staining, sections were blocked with 10% goat serum containing 0.4% Triton X-100 for 30 min to prevent nonspecific binding. The sections were incubated overnight at 4 °C with primary antibodies primary antibodies: anti-GFP (Invitrogen, A11122, 1:500), anti-Iba1 (Wako, 019-19741, 1:500), anti-CD68 (Santa Cruz, sc-20060, 1:200), anti-Stat1 (Proteintech, 82016-1-RR, 1:200). After being washed three times with PBS, the sections were incubated with appropriate secondary antibodies (Beyotime, 1:500) for 1 h at room temperature. Following three additional PBS washes, the sections were mounted with coverslips. All the images are captured with an Olympus VS200 microscope (Tokyo, Japan). Pictures are analyzed by NIH Image J.

For immunocytochemistry staining, cultured cells were fixed with 4% paraformaldehyde, were permeabilized and blocked with 0.4% Triton X-100 in 10% goat serum for 1 h at room temperature. Subsequently, the cells were incubated with primary antibodies: anti-dsRNA (Scicons, #10010200, 1:500), anti-TFAM (Proteintech, #22586-1-AP, 1:500), anti-GFP (Invitrogen, #A11122, 1:1000) overnight at 4°C, followed by three washes with PBS. The samples were then incubated with secondary antibodies for 1 h at room temperature. After three additional PBS washes, the samples were mounted on glass slides using ProLong Gold antifade reagent. All the images were captured with a Nikon Ax confocal microscope fitted with a 100×oil-immersion objective lens.

**Flow cytometry**

After mouse anesthesia with 5% chloral hydrate (7.5 mL/kg, i.p.), in vivo cardiac perfusion was performed with PBS. The brain was harvested, dissected into 1–2 mm³ pieces, and digested in 10 mL of digestion cocktail at room temperature for 15 min. The cell pellet was subjected to a discontinuous Percoll gradient centrifugation (resuspended in 37% Percoll, overlayed with 30% Percoll and HBSS) at 200 × g for 40 min. Mononuclear cells collected from the 70%-37% interface were washed with HBSS and stained for flow cytometric analysis on a CytoFLEX S (Beckman, USA).

**Cell isolation and culture**

Bone marrow cells were isolated from mouse femurs and tibias and cultured in Dulbecco’s Modified Eagle Medium (Gibco, US) supplemented with 10% heat-inactivated fetal bovine serum (Gibco, US), 1% penicillin–streptomycin and M-CSF (10 ng/ml, PeproTech, #315-02). THP-1 cells were maintained in RPMI-1640 (Gibco, US), 10% heat-inactivated fetal bovine serum (Gibco, US), and 1% penicillin–streptomycin (Beyotime, #C0222). Cells were grown at 37 °C in a humidified incubator equilibrated with 5% CO2. Purified native Human FSH protein (50ng/ml, Biosynth, #30-AF30-1) was used for THP-1 treatment, and recombinant mouse FSH α/β protein (R&D, #8576-FS) was used for BMDMs treatment.

**Nucleofection**

The plasmids pcDNA3.1-ADARB2-EGFP (PPL02757-2a) was purchased from Gene PPL technology, co, Ltd. (Nanjing, China). Human *ADARB2* siRNA sequences are as follows: 5’-CCAAGCGGAAAGATAAAGTAA. 200nM ppp’-mtRNA, 200nM NAD’-mtRNA, 200nM siRNA or 2 μg plasmid were incubated with a mixture of nucleofection solution and placed in nucleofection cuvettes. A total of 1 × 106 THP-1 were added to each cuvette and subjected to program V-001 for the Nucleofector 2D (Lonza). Cells were then plated in 6 well-plates and incubated 37 °C under 5% CO2 for 24 h.

**LC–MS untargeted metabolomics profiling**

Cells were deproteinized with cold methanol containing internal standards (carnitine C2:0-d3, C10:0-d3, C16:0-d3; LPC 19:0; FFA C16:0-d3, C18:0-d3; CA-d4, CDCA-d4; Phe-d5, Leu-d3, Trp-d5), followed by lyophilization and reconstitution in water/methanol (4:1, v/v). After centrifugation, the supernatant was subjected to LC–MS analysis. Separation was performed on a Shimadzu UHPLC system coupled to a TripleTOF 5600+ mass spectrometer using a Waters BEH C8 column (2.1 × 50 mm, 1.7 μm) in positive ion mode and an HSS T3 column (2.1 × 50 mm, 1.8 μm) in negative ion mode. The mobile phase consisted of water with 0.1% formic acid (A) and acetonitrile (B) under a gradient elution program (0–0.5 min, 5% B; 2.0 min, 40% B; 8.0 min, 100% B) at a flow rate of 0.4 mL/min and column temperature of 60 °C. MS parameters were set as follows: curtain gas 35 psi, sheath gas 55 psi, scan range m/z 100–1250 (full scan) and m/z 50–1250 (MS²), collision energy 10 eV (full scan) and 35 ± 15 eV (MS²), ion spray voltage ±5.5/–4.5 kV, and capillary temperature 550/450 °C for positive/negative modes, respectively. All analyses included internal standard-based retention time correction and signal response normalization to ensure quantitative accuracy.

**Proteomic**

Cells were ground in liquid nitrogen and proteins were extracted using SDS lysis buffer supplemented with protease inhibitors. Protein concentration was quantified by BCA assay (Thermo, #23227). Following acetone precipitation, proteins were reduced with dithiothreitol, alkylated with iodoacetamide, and digested with trypsin (1:50, w/w) overnight. Peptides were desalted using solid-phase extraction (PTM BIO, Hangzhou, China). Liquid chromatography separation was performed on a NanoElute UHPLC system with a homemade C18 column (25 cm × 100 μm) under a 90 min gradient. Mass spectrometry analysis was conducted on a timsTOF Pro 2 instrument operated in data-independent acquisition with parallel accumulation-serial fragmentation mode (MS1 range: 300–1500 m/z; MS2 range: 400–850 m/z). Raw data were processed using DIA-NN against the UniProt human database with false discovery rate <1%. Bioinformatics analysis included functional annotation via Gene Ontology, PFAM, and KEGG, subcellular localization prediction using WoLF PSORT/PSORTb, and protein-protein interaction network construction with STRING. Differential expression analysis, functional enrichment, and hierarchical clustering were applied to identified proteins.

**Bulk-RNA sequencing**

Total RNA was isolated using TRIzol reagent following the manufacturer's protocol. RNA purity and concentration were measured on a NanoDrop 2000 spectrophotometer (Thermo Scientific), and RNA integrity was assessed with an Agilent 2100 Bioanalyzer (Agilent Technologies). Sequencing libraries were prepared with the TruSeq Stranded mRNA LT Sample Prep Kit (Illumina) according to the manufacturer's instructions. Transcriptome sequencing and subsequent bioinformatic analyses were performed by Novogene (Beijing, China).

**Mitochondrial isolation**

Cultured BMDMs were dissociated with trypsin, washed with PBS, and centrifuged at 500 g for 10 min at 4 °C. The resulting pellet was resuspended in mitochondrial isolation buffer composed of 210 mM mannitol, 70 mM sucrose, 1 mM EDTA, and 10 mM HEPES (pH 7.2), supplemented with 0.25% fatty acid-free BSA. Homogenization was performed using an IKA RW20 digital homogenizer at 12000 rpm for 20 passes in a cold room. The homogenate was then centrifuged at 800 g for 5 min at 4 °C. The supernatant, containing the mitochondria, was collected and centrifuged at 10,000 g for 10 min at 4 °C. The final mitochondrial pellet was retained for subsequent analysis.

**NAD+ analysis of mitochondria**

NAD+ in mitochondria isolated from BMDMs was assayed in a 96-well format via an enzymatic cycling reaction following protocol instruction (Promega, #G9071). Subsequently, the NAD+ concentration was quantified by measuring the fluorescence accumulation rate of resorufin (excitation 544 nm/emission 590 nm) using a microplate reader, and all values were normalized to the total protein concentration.

**Cytosolic mitochondria RNA expression**

PBS resuspended cells were aliquoted equally to 2 tubes. 1 tube was used to extract cytosolic fraction. Cells were resuspended in roughly 500 μl buffer containing 150 mM NaCl, 50 mM HEPES pH 7.4, and 25 μg/ml digitonin (Selleck, #E1321). Following a 10 min incubation at 4°C with constant rotation for selective plasma membrane permeabilization, samples were centrifuged at 980 × g for 10 min at 4°C. The cytosolic supernatants were collected and further centrifuged at 17000 × g for 10 min at 4°C to pellet and remove cellular debris, mitochondria, and nuclei. RNA was extracted and purified in both tubes using RNA extraction kit according to manufacturer’s protocol (RNAfast 200, Fastgen). Mitochondrial gene transcripts in the cytosolic fraction were evaluated by real time qPCR using mitochondrial genome specific primers. qRT-PCR was run in the LightCycler 480 II (Roche) instrument using SYBR Green Master Mix (Applied Biosystems, #4367659).

**ρ0 THP-1 cells**

THP-1 cells were subjected to an 8 day culture in RPMI 1640 medium containing 100 ng/ml ethidium bromide, and 1 mM sodium pyruvate to generate ρ0 cells, a model of mitochondrial DNA/RNA depletion. Successful mtRNA depletion was verified by qPCR. While no overt cytotoxicity was observed, EtBr-treated cells exhibited reduced proliferation.

**Mitochondrial RNA Transfer**

400 μg isolated mitochondria RNA were nucleofected to the cultured ρ0 cells. Non-transfected cells set as control.

**Western blot**

Cell or brain lysates were homogenized in TNE buffer (10 mM Tris, 150 mM NaCl, 1 mM EDTA, 1% NP-40, 10% glycerol, and protease inhibitors), and the supernatants were collected following centrifugation. Protein concentrations were determined using a Pierce BCA Protein Assay Kit (Thermo Fisher Scientific, #23225). Subsequently, equal amounts of proteins were denatured by heating at 98°C for 5 min in 5×loading buffer (Beyotime, #P0280). Equal amounts of protein from each sample were resolved on a 10% SDS-PAGE gel and subsequently transferred to PVDF membranes (Millipore). Following a 1 h block with 5% non-fat milk in TBST, the membranes were incubated overnight at 4°C with anti-FSHR (1:1000, Proteintech, #22665-1-AP), anti-p-Stat1 (1:1000, CST, #9167), anti-Stat1(1:1000, Proteintech, #10144-2-AP), anti-p-IRF3 (1:1000, CST, #29047), anti-IRF3 (1:1000, CST, #4302), p-TBK1 (1:1000, CST, #5483), TBK1 (1:1000, CST, #3013), ADARB2 (1:500, Santa Cruz, #sc-73410), GAPDH (1:5000, Beyotime, #AF0006) and α-Tubulin (1:5000, Beyotime, #AF2827). After primary antibody incubation, the membranes were probed with their respective secondary antibodies at a 1:5000 dilution for 1 h at room temperature. Signal was detected by enhanced chemiluminescence (Millipore, WBULP).

**ELISA**

Mice serum, cell supernatant‌ and brain tissue were concentrated by centrifuging, resulting concentrations were measured using a Pierce BCA Protein Assay Kit (Thermo Fisher Scientific, #23225). The levels of Ifn-β of mice serums and tissue extracts were measured by using a mouse Ifn-β ELISA Kit (Biolegend, #439404). The levels of IFN-β of THP-1 cell supernatant were measured by using a human IFN-β ELISA Kit (Biolegend, #439504). The levels of mouse estrogen were determined by ELISA kit (CUSABIO, #CSB-E07280m). The levels of mouse Fsh were determined by ELISA kit (Elabscience, #E-EL-M0511).

**Biolayer interferometry**

Binding inhibition between Adarb2 and small molecular inhibitors was analyzed by BLI using an Octet® R4 (Sartorius, Germany) equipped with NTA biosensors. Human Adarb2 222-524 aa (Proteintech, #Ag18828) was immobilized onto the biosensor surface. Association and dissociation were monitored for 300 seconds each in running buffer. All steps were performed at 30°C with agitation at 400 rpm. Data were acquired and normalized using Octet Data Analysis Software (v9.0.0.14).

**Statistics**

Data are presented as mean ± SEM. Differences between two groups were analyzed by an unpaired two-tailed Student’s t-test. For comparisons among three or more groups, one-way ANOVA followed by Tukey’s post hoc test was performed. Metabolomics data were analyzed using Welch’s two-sample t-test. A P value of less than 0.05 was considered statistically significant.

1 Guo, Y. *et al.* Blocking FSH inhibits hepatic cholesterol biosynthesis and reduces serum cholesterol. *Cell Res* **29**, 151-166, doi:10.1038/s41422-018-0123-6 (2019).

2 Wolfram-Schauerte, M. *et al.* A viral ADP-ribosyltransferase attaches RNA chains to host proteins. *Nature* **620**, 1054-1062, doi:10.1038/s41586-023-06429-2 (2023).

3 Grudzien-Nogalska, E., Bird, J. G., Nickels, B. E. & Kiledjian, M. "NAD-capQ" detection and quantitation of NAD caps. *RNA* **24**, 1418-1425, doi:10.1261/rna.067686.118 (2018).
