# Supplementary material for: Myeloid FSH-FSHR signaling drives menopause-associated cognitive decline via a mitochondrial RNA-dependent neuroinflammation axis
Source: Research Square preprint supplement (doi:10.21203/rs.3.rs-8773348/v1), 2026-02-09
Supplement: Supplementary file 2 [file d9598a4e252135054e5c980e.docx]

**Supplementary table 1. Primers for RT-PCR used in this paper**

| **Gene name** | **Species** | **Sequence** |
| --- | --- | --- |
| Ifnb2 | Mus | Forward: 5’ AGTTACACTGCCTTTGCC 3’  Reverse: 5’ GTTGAGGACATCTCCCAC 3’ |
| Ifna4 | Mus | Forward: 5’ ACCCACAGCCCAGAGAGTGACC 3’  Reverse: 5’ AGGCCCTCTTGTTCCCGAGGT 3’ |
| IFNB1 | Hu | Forward: 5’ CAACAAGTGTCTCCTCCAAAT 3’  Reverse: 5’ TCTCCTCAGGGATGTCAAAG 3’ |
| Il-1β | Mus | Forward: 5’ GCAACTGTTCCTGAACTCAACT 3’  Reverse: 5’ ATCTTTTGGGGTCCGTCAACT 3’ |
| Ccl2 | Mus | Forward: 5’ AGGTGTCCCAAAGAAGCTGT 3’  Reverse: 5’ GACCTTAGGGCAGATGCAGTT 3’ |
| Adarb2 | Mus | Forward: 5’ GCTGCGAGAAAACATCCTCTTCC 3’  Reverse: 5’ CCTCGGAACTTCCTGACGATGT 3’ |
| B2m | Mus | Forward: 5’ CCCGCCTCACATTGAAATCC 3’  Reverse: 5’ GTCTCGATCCCAGTAGACGG 3’ |
| ADARB2 | Hu | Forward: 5’ GACGCTTGTCTCCTTAGTCTTCCCGGATTG 3’  Reverse: 5’ CATCTGACCCGTGCTATTTGCTGTCGTGTG 3’ |
| β-actin | Mus | Forward: 5’ CAACTTGATGTATGAAGGCTTTGGT 3’  Reverse: 5’ ACTTTTATTGGTCTCAAGTCAGTGTACAG 3’ |
| GAPDH | Hu | Forward: 5’ GACACCCACTCCTCCACCTTTG 3’  Reverse: 5’ GTCCACCACCCTGTTGCTGTAG 3’ |
| Mt-CO1 | Hu | Forward: 5’ ACGTTGTAGCCCACTTCCAC 3’  Reverse: 5’ TGGCGTAGGTTTGGTCTAGG 3’ |
| Mt-ND5 | Hu | Forward: 5’ TCGAAACCGCAAACATATCA 3’  Reverse: 5’ CAGGCGTTTAATGGGGTTTA 3’ |
| Mt-ND6 | Hu | Forward: 5’ CCAATAGGATCCTCCCGAAT 3’  Reverse: 5’ AGGTAGGATTGGTGCTGTGG 3’ |
| Mt-Nd1 | Mus | Forward: 5’ CTAGCAGAAACAAACCGGGC 3’  Reverse: 5’ CCGGCTGCGTATTCTACGTT 3’ |

**Supplementary table 2. Antibodies used in this paper**

| **Name** | **Manufacturer** | | **Catalog** | **Source** | **Application and dilute** |
| --- | --- | --- | --- | --- | --- |
| Adarb2 | Santa Cruz | sc-73410 | | Rabbit | WB 1:1000 |
| dsRNA J2 | Scicons | 10010200 | | Mouse | ICC 1:500 |
| TFAM | Proteintech | 22586-1-AP | | Rabbit | ICC 1:500 |
| GFP | Thermo Fisher | A11122 | | Rabbit | IHC 1:500  ICC 1:1000 |
| CD68 | Santa Cruz | sc-20060 | | Mouse | IHC 1:200 |
| Iba1 | WAKO | 019-19741 | | Rabbit | IHC 1:500 |
| Stat1 | Proteintech | 82016-1-RR | | Rabbit | WB 1:1000  IHC 1:200 |
| GAPDH | Beyotime | AF0006 | | Mouse | WB 1:5000 |
| α-Tubulin | Beyotime | AF2827 | | Mouse | WB 1:5000 |
| p-Stat1 | CST | 9167 | | Rabbit | WB 1:1000 |
| IRF3 | CST | 4302 | | Rabbit | WB 1:1000 |
| p-IRF3 | CST | 29047 | | Rabbit | WB 1:1000 |
| TBK1 | CST | 3013 | | Rabbit | WB 1:1000 |
| p-TBK1 | CST | 5483 | | Rabbit | WB 1:1000 |
| Brilliant Violet 42™ anti-mouse CD45 | Biolegend | 103133 | | Rat | FCM 2.5μl |
| APC anti-mouse/human CD11b | Biolegend | 101211 | | Rat | FCM 0.5μl |
| PE/Cyanine7 anti-mouse F4/80 Antibody | Biolegend | 123113 | | Rat | FCM 0.5μl |
| Brilliant Violet 650™ anti-mouse Ly6C | Biolegend | 128049 | | Rat | FCM 0.25μl |
| Alexa Fluor® 700 anti-mouse CD86 | Biolegend | 105023 | | Rat | FCM 1μl |
| BD Horizon™ PE-CF594 Anti-mouse CD80 | BD | 562504 | | Hamster | FCM 2.5μl |
| APC anti-mouse I-A/I-E | Biolegend | 107613 | | Rat | FCM 0.5μl |
| PE anti-mouse CX3CR1 | Biolegend | 153705 | | Rat | FCM 0.5μl |
| PE anti-mouse/human CD11b | Biolegend | 101207 | | Rat | FCM 0.5μl |
| EasySep™ Mouse CD11b Positive Selection Kit | STEMCELL | #18970 | | - | - |
| HRP anti-Rabbit IgG | Jackson Immuno | 111-035-003 | | Goat | WB 1:5000 |
| HRP anti-Mouse IgG | Jackson Immuno | 115-035-003 | | Goat | WB 1:5000 |
| Alexa Fluor™ 555 anti-Rabbit IgG | Thermo Fisher | A21422 | | Goat | IHC 1:500  ICC 1:500  FCM 1:1000 |
| Alexa Fluor™ 555 anti-Mouse IgG | Thermo Fisher | A21429 | | Goat | IHC 1:500  ICC 1:500 |
| Alexa Fluor™ 488 anti-Rabbit IgG | Thermo Fisher | A11008 | | Goat | IHC 1:500  ICC 1:500 |
| Alexa Fluor™ 647 anti-Mouse IgG | Thermo Fisher | A21235 | | Goat | IHC 1:500 |

**Supplementary table 3. Regents used in this study**

| **Regent** | **Manufacturer** | **Catalog** | **Usage** |
| --- | --- | --- | --- |
| Clodronate liposomes | Yeasen Biotechnology | 40337ES08 | i.o. 400 μl/kg |
| Control Liposomes (PBS) | Yeasen Biotechnology | 40338ES08 | i.o. 400 μl/kg |
| 8-Azanebularine | MCE | HY-145442 | i.p. 2 mg/kg  500 nM for THP-1 |
| 8-Azaadenosine | MCE | HY-115686 | - |
| GnRHa | Ferring | Triptorelin | i.p. 0.25 μg/day |
| FSH | Merck | Gonal-F | i.p. 15 IU/kg |
| Recombinant mouse FSH α/β | R&D | 8576-FS | 25ng/ml, 50ng/ml |
| Purified native Human FSH | Biosynth | 30-AF30-1 | 50 ng/ml |
| Estradiol | Bayer | PROGYNOVA | 2.6 mg/kg diet |
| Doxycycline | Sigma-Aldrich | D3447 | 200 μg/ml drink |
| Mouse M-CSF | PeproTech | 315-02 | 10 ng/ml |
| AAV9: F4/80-GFP-miR30-sh*Fshr* | Vigenebio | 6.41×1013vg/ml | i.o. 10 ul |
| AAV9: F4/80-GFP-miR30-sh*NC* | Vigenebio | 7.08×1013vg/ml | i.o. 10 ul |
| pLent-U6-sh*Adarb2*-CMV-RFP-P2A-Puro | Vigenebio | 4×108 TU/ml | Cell culture |
| pLent-U6-sh*NC*-CMV-RFP-P2A-Puro | Vigenebio | 6×108 TU/ml | Cell culture |
| Puromycin | Sigma-Aldrich | P9620 | 100 μg/ml |
| NMN | Sigma-Aldrich | N3501 | 500 μM |
| FK866 | Selleck | S2799 | 50 nM |
| Ethidium bromide | MCE | D0021 | 100 ng/ml |
| NAD | Sigma-Aldrich | N0632 | 4 mM |
| T7 High Yield RNA Synthesis | YEASEN | 10623ES50 | - |
| PCR purification kit | TIANGEN | DP209 | - |
| DNase I | SparkJade | AC1711 | 10U for BMDMs |
| Urea | Solarbio | U8020 | 2 M |
| Tris | Sigma-Aldrich | T6687 | 10 mM |
| Ammonium acetate | Sigma-Aldrich | 5.33004 | 2 M |
| Nuclease P1 | NEB | M0660S | 1 U |
| NAD/NADH Assay Kit | Promega | G9071 | - |
| FD Rapid GolgiStain™ Kit | FD NeuroTechnologies | PK401 | - |
| Percoll | GE Healthcare | 17089101 | - |
| Dulbecco’s Modified Eagle Medium | Gibco | 11965092 | - |
| RPMI 1640 | Gibco | 11875 | - |
| Fetal bovine serum | Gibco | 26170043 | - |
| Penicillin–streptomycin | Beyotime | C0222 | - |
| BCA assay kit | Thermo | 23225 | - |
| Digitonin | Selleck | E1321 | - |
| RNA extraction kit | Fastgen | RNAfast 200 | - |
| SYBR Green Master Mix | Applied Biosystems | 4367659 | - |
| Sodium pyruvate | Solarbio | P8380 | 1 mM |
| Protease cocktail inhibitors | Beyotime | P1005 | 1:100 |
| Mitochondria Isolation Kit | Abcam | ab110169 | - |
| 5×loading buffer | Beyotime | P0280 | - |
| Mouse Ifn-β ELISA Kit | Biolegend | 439404 | - |
| Human IFN-β ELISA Kit | Biolegend | 439504 | - |
| Mouse E2 ELISA Kit | CUSABIO | CSB-E07280m | - |
| Mouse FSH ELISA Kit | Elabscience | E-EL-M0511 | - |
| Human Adarb2 222-524 aa | Proteintech | Ag18828 | - |
| pcDNA3.1-ADARB2-EGFP | Gene PPL | PPL02757-2a | - |
| RNase I | Thermo | EN0601 | 100U for BMDMs |

**Supplementary table 4. siRNA targeted sequences**

| **Gene** | **Species** | **Sequence** |
| --- | --- | --- |
| Fshr | Mus | 5’ CCTACCCAACUUGCAUGAAAU 3’ |
| ADARB2 | Hu | 5’ CCAAGCGGAAAGAUAAAGUAA 3’ |
| Adarb2 | Mus | 5’ CGACCUGGAGAUCAUUAAU 3’ |
